# Supplementary material for: Relationship between Night Shifts and Risk of Breast Cancer among Nurses: A Systematic Review
Source: PubMed Central journal article supplement (PMC7764664; doi:10.3390/medicina56120680), 2020-12-10
Supplement: medicina-56-00680-s001.pdf [file medicina-56-00680-s001.pdf]

Table S1. Search strategy in databases.

| Database | Date       | Search strategy                                                                                                                                                                                                                                                                                                                                                                                                                                                                                                                                                                                                                                                                                                                                                                                                                                                                                                                                                                                                                                                                                                                                                                                                                                                                                                                                                                                                                                                                                                                                                                                       | Total articles | Pre-selected articles |
|----------|------------|-------------------------------------------------------------------------------------------------------------------------------------------------------------------------------------------------------------------------------------------------------------------------------------------------------------------------------------------------------------------------------------------------------------------------------------------------------------------------------------------------------------------------------------------------------------------------------------------------------------------------------------------------------------------------------------------------------------------------------------------------------------------------------------------------------------------------------------------------------------------------------------------------------------------------------------------------------------------------------------------------------------------------------------------------------------------------------------------------------------------------------------------------------------------------------------------------------------------------------------------------------------------------------------------------------------------------------------------------------------------------------------------------------------------------------------------------------------------------------------------------------------------------------------------------------------------------------------------------------|----------------|-----------------------|
| Cochrane | 07/07/2020 | <p>#1 shift work disorder<br/>                     #2 breast neoplasms<br/>                     #3 breast cancer<br/>                     #4 nurse<br/>                     #5 nursing<br/>                     #6 (#1) AND (#2 OR 3#) AND (4# OR 5#) with Cochrane Library publication date Between Jul 2010 and Jul 2020, in Cochrane Reviews.</p>                                                                                                                                                                                                                                                                                                                                                                                                                                                                                                                                                                                                                                                                                                                                                                                                                                                                                                                                                                                                                                                                                                                                                                                                                                                  | 196            | 0                     |
| Pubmed   | 07/07/2020 | <p>Search: shift work schedule AND (breast neoplasms OR breast cancer) AND (nurse OR nursing) Filters: Clinical Trial, Meta-Analysis, Randomized Controlled Trial, Review, Systematic Review, in the last 10 years Sort by: Most Recent<br/>                     (((("shift work schedule"[MeSH Terms] OR (("shift"[All Fields] AND "work"[All Fields]) AND "schedule"[All Fields])) OR "shift work schedule"[All Fields]) AND (((("breast neoplasms"[MeSH Terms] OR ("breast"[All Fields] AND "neoplasms"[All Fields])) OR "breast neoplasms"[All Fields]) OR (((("breast neoplasms"[MeSH Terms] OR ("breast"[All Fields] AND "neoplasms"[All Fields])) OR "breast neoplasms"[All Fields]) OR ("breast"[All Fields] AND "cancer"[All Fields])) OR "breast cancer"[All Fields]))) AND (((((((((((("nurse s"[All Fields] OR "nurses"[MeSH Terms]) OR "nurses"[All Fields]) OR "nurse"[All Fields]) OR "nurses"[All Fields]) OR "nursing"[MeSH Terms]) OR "nursing"[All Fields]) OR "nursings"[All Fields]) OR "nursing"[MeSH Subheading]) OR "breast feeding"[MeSH Terms]) OR ("breast"[All Fields] AND "feeding"[All Fields])) OR "breast feeding"[All Fields]) OR "nursing s"[All Fields]) OR (((((((((((("nurse"[All Fields] OR "nurses"[MeSH Terms]) OR "nurses"[All Fields]) OR "nurse"[All Fields]) OR "nurses"[All Fields]) OR "nursing"[MeSH Terms]) OR "nursing"[All Fields]) OR "nursings"[All Fields]) OR "nursing"[MeSH Subheading]) OR "breast feeding"[MeSH Terms]) OR ("breast"[All Fields] AND "feeding"[All Fields])) OR "breast feeding"[All Fields]) OR "nursing"[All Fields]))</p> | 29             | 7                     |

|                                         |            |                                                                                                                                                                                                                                                                                                                                                                                                                                                                                                                                                                                                                                                                                     |     |    |
|-----------------------------------------|------------|-------------------------------------------------------------------------------------------------------------------------------------------------------------------------------------------------------------------------------------------------------------------------------------------------------------------------------------------------------------------------------------------------------------------------------------------------------------------------------------------------------------------------------------------------------------------------------------------------------------------------------------------------------------------------------------|-----|----|
| CINAHL                                  | 08/07/2020 | Shift work schedule AND ((breast neoplasms OR breast cancer)) AND ((nurse OR nursing)). Limits – Available abstract; Publication date: 20100701-20200731. Expanders - Apply equivalent subjects. Search modes - Booleano/Frase.                                                                                                                                                                                                                                                                                                                                                                                                                                                     | 1   | 1  |
| Web of Science                          | 08/07/2020 | SUBJECT: ((shift work schedule) AND (breast neoplasms OR breast cancer) AND (nurse OR nursing)). Refined by: Open access: (OPEN ACCESS) Time period: 2010-2020. Indexes: SCI-EXPANDED, SSCI, A&HCI, CPCI-S, CPCI-SSH, BKCI-S, BKCI-SSH, ESCI, CCR-EXPANDED, IC.                                                                                                                                                                                                                                                                                                                                                                                                                     | 22  | 9  |
| Science Direct                          | 08/07/2020 | ALL FIELDS Shift work schedule AND (breast neoplasms OR breast cancer) AND (nurse OR nursing) AND occupational risk factor AND PUBYEAR > 2010.<br>Type of document: Review articles (62) and Research articles (44)                                                                                                                                                                                                                                                                                                                                                                                                                                                                 | 106 | 7  |
| Scopus                                  | 08/07/2020 | TITLE-ABS-KEY (((shift AND work AND schedule) Y (mama y neoplasias o mama y cáncer) Y (enfermera o enfermería)) Y (LIMIT-TO (ACCESSTYPE(OA))) Y (LIMIT-TO (PUBYEAR, 2019) O LIMIT-TO (PUBYEAR, 2018) O LIMIT-A (PUBYEAR, 2017) O LIMIT-TO (PUBYEAR, 2016) O LIMIT-TO ( PUBYEAR, 2015) O LIMIT-TO ( PUBYEAR , 2014 ) O LIMIT-TO (PUBYEAR , 2013) O LIMIT-TO ( PUBYEAR , 2012 ) O LIMIT-TO ( PUBYEAR , 2011 ) O LIMIT-TO (PUBYEAR , 2010)) Y (LIMIT-TO (DOCTYPE, "ar") O LIMIT-TO (DOCTYPE, "re re")) Y (LIMIT-TO (EXACTKEYWORD, "Breast Cancer") O LIMIT-TO ( EXACTKEYWORD , "Nurse" ) O LIMIT-TO (EXACTKEYWORD , "Shift Worker") O LIMIT-TO ( EXACTKEYWORD , "Circadian Rhythm" ) ) | 16  | 12 |
| Dialnet                                 | 27/07/2020 | Trabajo por turnos AND cáncer de mama. Type: journal article. Years range 2010 – 2019. Descriptors: breast cancer, circadian disruption, shift work; cáncer de mama, disrupción circadiana, trabajo por turnos.                                                                                                                                                                                                                                                                                                                                                                                                                                                                     | 1   | 1  |
| TOTAL PRE-SELECTED ARTICLES             |            |                                                                                                                                                                                                                                                                                                                                                                                                                                                                                                                                                                                                                                                                                     |     | 37 |
| TOTAL ARTICLES AFTER DUPLICATES REMOVAL |            |                                                                                                                                                                                                                                                                                                                                                                                                                                                                                                                                                                                                                                                                                     |     | 25 |
